# Supplementary material
Source: PubMed Central journal article supplement (PMC8074926)
Supplement: NIHMS1569222-supplement-8.pdf [file NIHMS1569222-supplement-8.pdf]

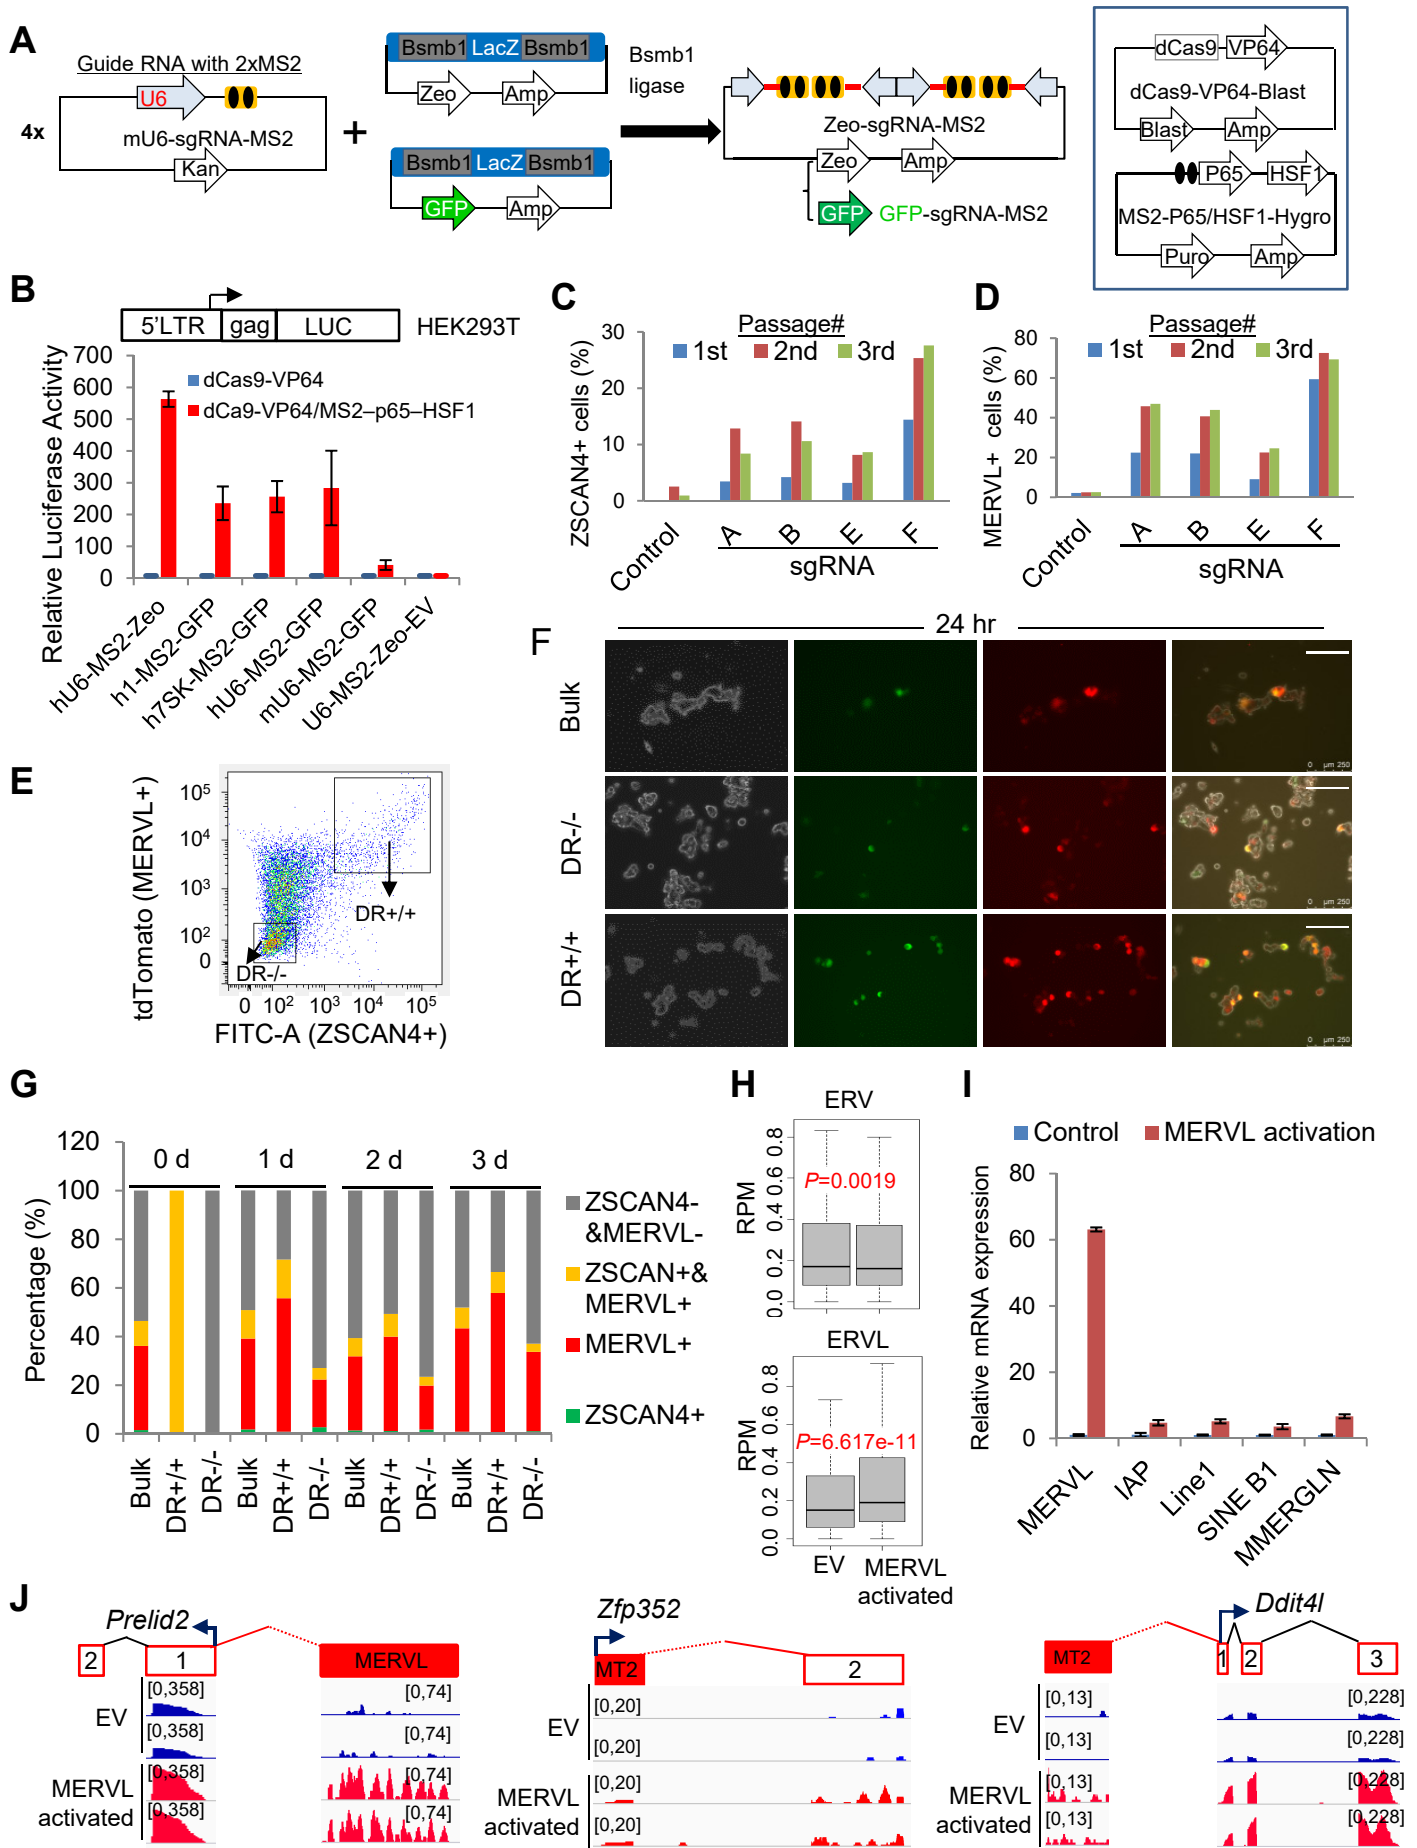

Figure S1

**Figure S1. MERVL activation is sufficient to induce 2C-like cells. Related to Figure 1.**

- (A) Strategy of golden gate assembly to create lentiviral vectors encoding CRISPR/dCas9 and multiple sgRNA expression cassettes.
- (B) Relative luciferase activity by U6/h1-driven 1x “F” sgRNA with (red) or without (blue) MS2 in HEK293T cells. Fold activation denotes relative luciferase activity normalized to an empty sgRNA expression vector. Data are presented as average  $\pm$  SD.
- (C-D) FACS profiles of Zscan4+ (C) and MERVL+ (D) populations after MERVL activation by different sgRNAs after 3 passages. ESCs were passed every three days.
- (E) FACS plot of the pZscan4c-GFP (x-axis) and MERVL::tdTomato (y-axis) dual-reporter ESC line (DR+/+).
- (F) Images of bulk (top), FACS-sorted DR-/- (middle), and DR+/+ (bottom) cells replated separately, then cultured for 24h. Scale bars, 250  $\mu$ m.
- (G) The proportion of MERVL+, Zscan4+, MERVL+Zscan4+ (DR+/+), and MERVL-Zscan4- (DR-/-) cells of bulk and FACS-sorted DR-/- and DR+/+ cells separately cultured for 3 days.
- (H) Expression of total ERV and ERVL elements in the empty vector (EV) and MERVL-activated cells. P-value is from Mann-Whitney test.
- (I) Relative MERVL induction levels in control and MERVL-activated cells analyzed by RT-qPCR. Multiple ERV families were tested. Data are presented as average  $\pm$  SD.
- (J) Examples of induced expression of MERVL-proximal genes *Zfp352*, *Preli2*, and *Ddit4l* in MERVL-activated cells compared with empty vector (EV) treated cells. Locations of the coding exons and the nearby MERVL solo LTR (MT2, for *Ddit4l*, *Zfp352*) or entire MERVL (for *Preli2*) regions are connected by dotted red lines. RNA-seq peaks were shown.

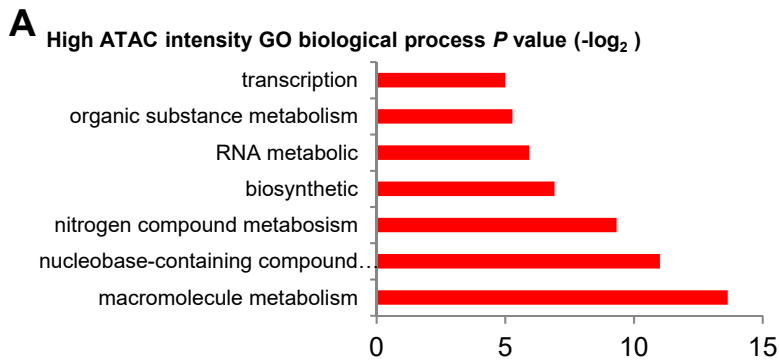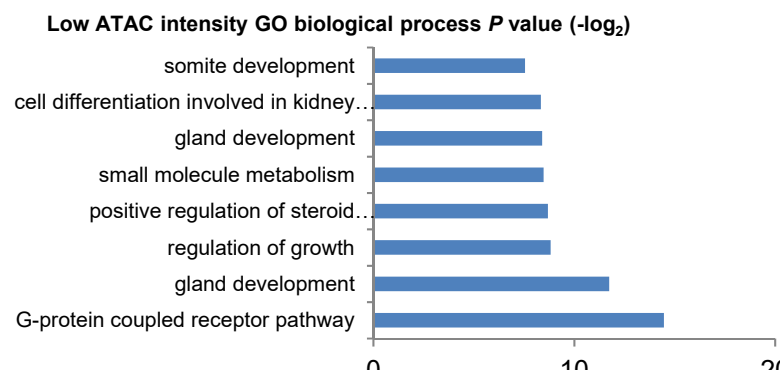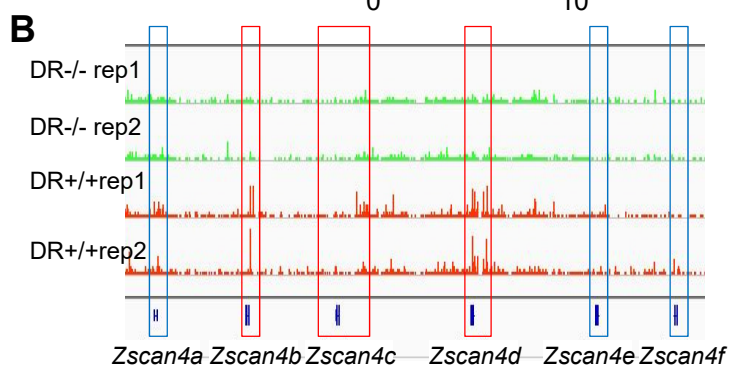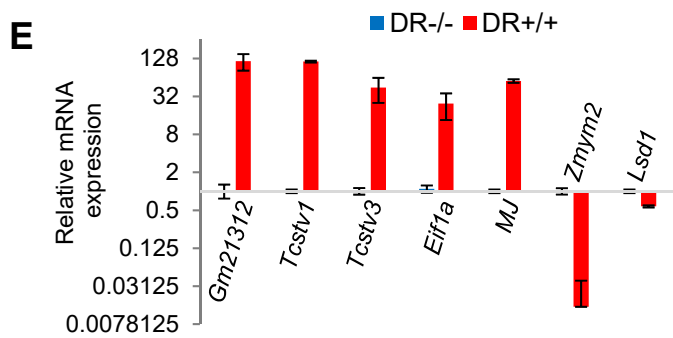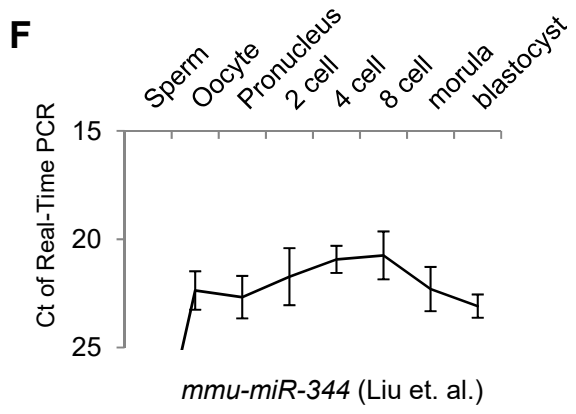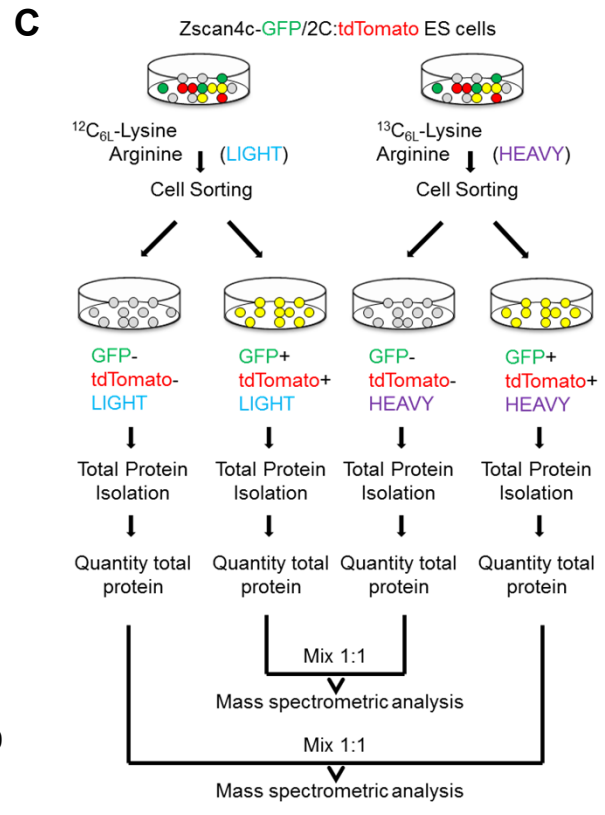

**D**

| Gene           | Oocyte Mean | 2C Mean | Fold Change | P-value  |
|----------------|-------------|---------|-------------|----------|
| <i>Gm5662</i>  | 40.68       | 1223.68 | 4.91        | 7.70E-16 |
| <i>Zscan4b</i> | 108.00      | 2382.12 | 4.46        | 2.05E-16 |
| <i>Zscan4c</i> | 206.00      | 2640.00 | 3.68        | 1.09E-12 |
| <i>Zscan4d</i> | 184.67      | 2438.12 | 3.72        | 1.13E-12 |
| <i>Zscan4e</i> | 109.24      | 2377.89 | 4.44        | 2.33E-16 |
| <i>Zscan4f</i> | 186.55      | 2677.18 | 3.84        | 1.46E-13 |

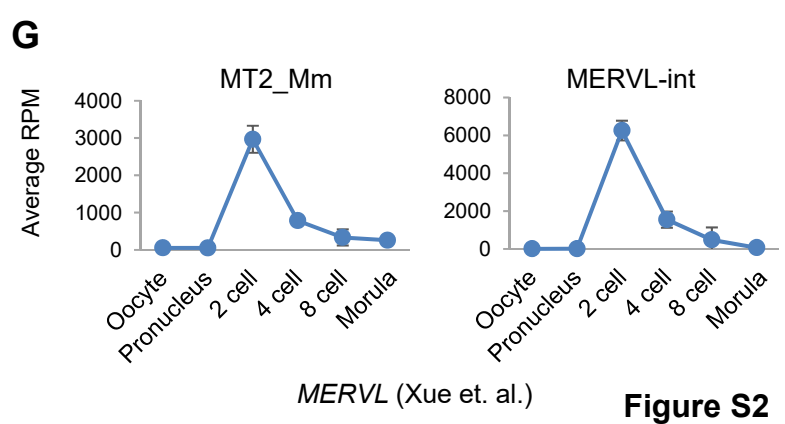

**Figure S2**

**Figure S2. Discovery of miR-344 as a totipotency-associated miRNA. Related to Figure 2.**

- (A) Gene Ontology (GO) analysis of biological processes of genes with significantly enriched ATAC-seq signals between DR<sup>-/-</sup> and DR<sup>+/+</sup> cells.
- (B) The genome browser view of ATAC-seq signals enriched at the *Zscan4* gene cluster.
- (C) The strategy of SILAC labeling and LC-MS/MS analysis. Two biological replicates with reciprocal labeling were performed to compare the proteome of DR<sup>-/-</sup> and DR<sup>+/+</sup> cells.
- (D) Expression of 2C-specific genes *Gm5662* and *Zscan4b/c/d/e/f* in the oocyte and 2C embryo. Data were from a public RNA-seq study (Macfarlan et al., 2012).
- (E) RT-qPCR analysis of totipotency related genes in DR<sup>+/+</sup> and DR<sup>-/-</sup> cells. Data are presented as average  $\pm$  SD.
- (F) Expression of miR-344 during mouse preimplantation embryo. Data were from a public miRNA array study (Liu et al. 2012).
- (G) Expression of MERVL elements MERVL-int and MT2\_Mm during mouse preimplantation development. Data were from a public RNA-seq study (Xue et al., 2013).

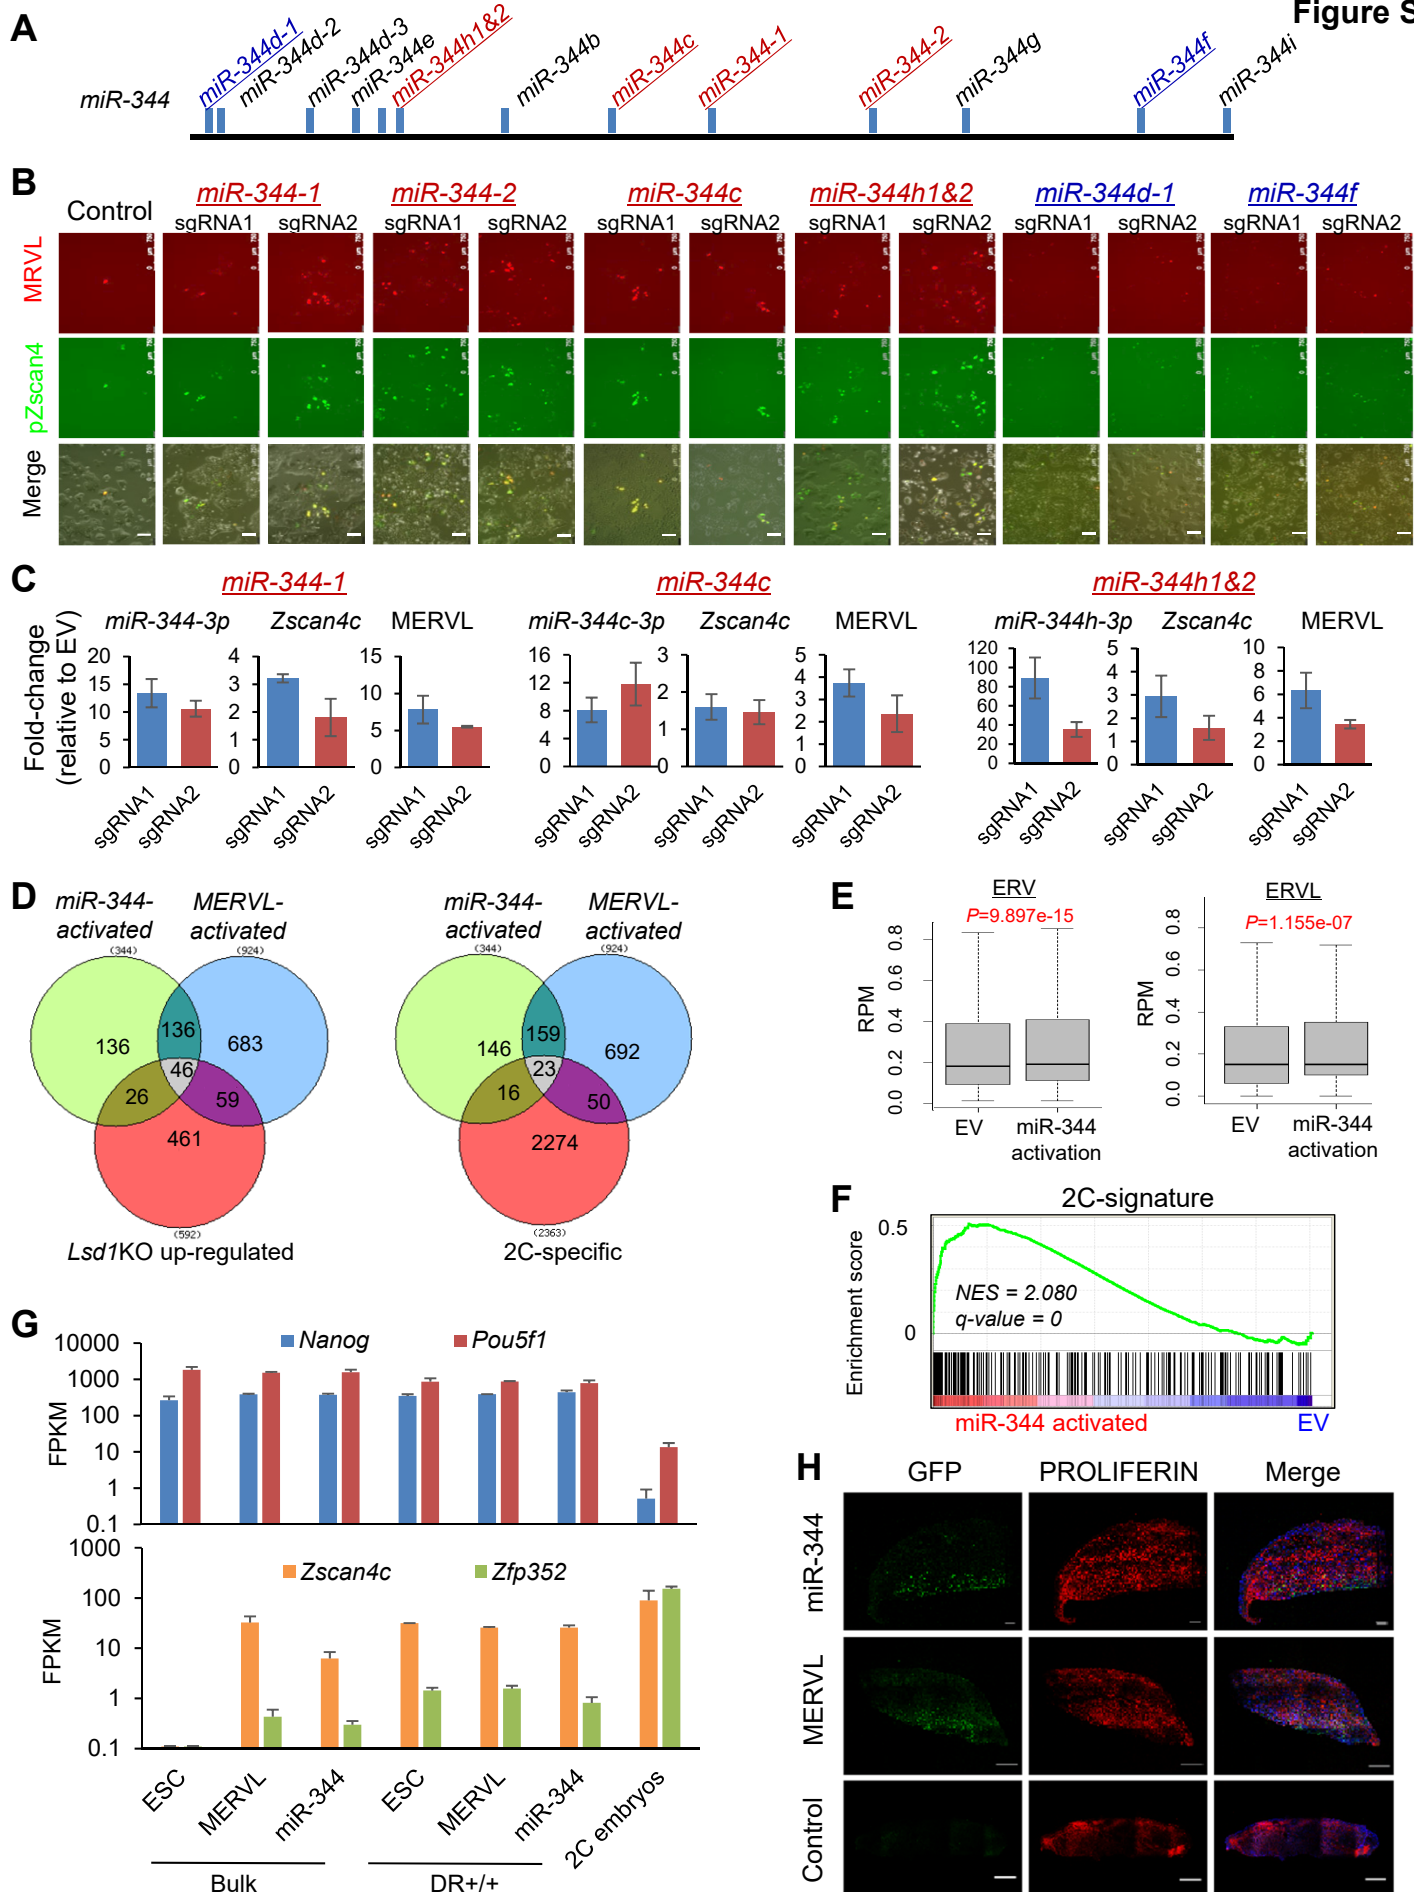

**Figure S3. Endogens *miR-344* activation by CRISPR<sup>SAM</sup> induces 2C-like cells with expanded potency in vivo. Related to Figure 3.**

- (A) Schematic diagram of the mouse *miR-344* cluster loci, which contains 13 individual miR genes. 12 sgRNAs were designed to activate 6 *miR-344* genes (2 sgRNAs for each gene), including miR-344-1/2/c/h (red) that are expressed in DR<sup>+/+</sup> cells, and miR-344-d/f (blue) as negative controls.
- (B) Images of ESCs transfected with double (pZscan4c-GFP/2C::tdTomato) reporters and sgRNAs for activating different *miR-344* cluster genes, with 2 sgRNAs for each gene. Refer to Figure 3A. Scale bars, 250  $\mu$ m.
- (C) Relative expression of mature miR-344, 2C-specific genes *Zscan4c* and *MERV1* in *miR-344-1-*, *miR-344c-/miR-344h1&2-*activated cells. Data are presented as average  $\pm$  SD
- (D) Venn diagrams showing overlapped genes up-regulated in *MERV1-* and miR-344-activated ESCs, and genes upregulated in *Lsd1*KO ESCs or 2C-specific genes.
- (E) Box plots showing the expression of total ERV and ERVL elements in the empty vector (EV) and *miR-344-2-*activated cells. P-value is from Mann-Whitney test.
- (F) Gene set enrichment analysis (GSEA) indicating that upregulated genes by miR-344 activation were highly enriched in the 2-cell embryo gene set (Wu et al., 2016). Red, upregulated genes; blue, downregulated genes.
- (G) Expression of pluripotency genes (*Nanog*, *Pou5f1*) and 2C genes (*Zscan4c*, *Zfp352*) in bulk or DR<sup>+/+</sup> sorted ESCs or *MERV1-* and miR344-activated ESCs. Data are presented as average  $\pm$  SD.
- (H) Representative whole-placenta confocal images showing both GFP-labeled miR-344-activated and *MERV1-*activated mESCs can contribute to trophoblastic lineages in chimeric E12.5 placentae. Scale bars, 200  $\mu$ m.

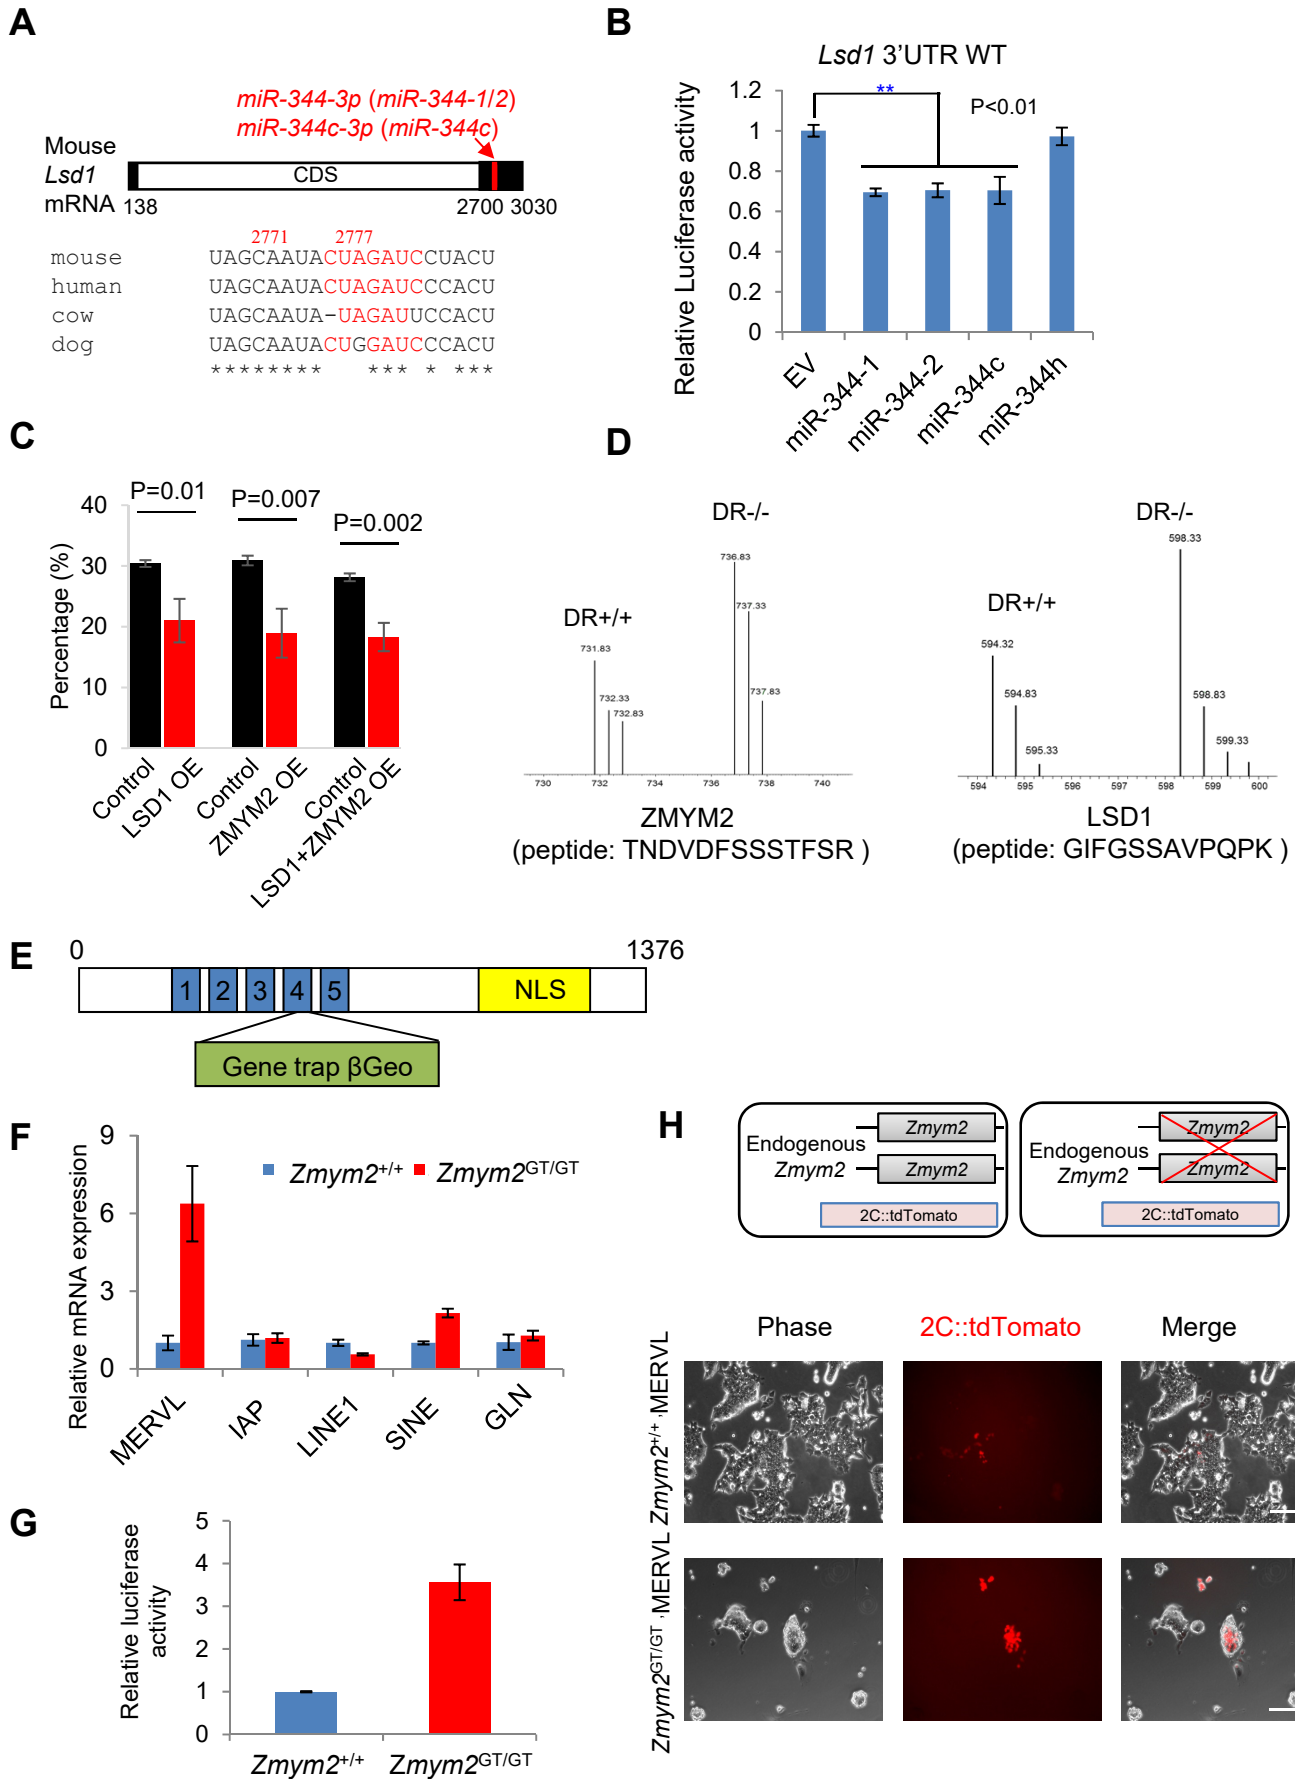

Figure S4

**Figure S4. Zmym2 and Lsd1 are the targets of miR-344. Related to Figure 4.**

- (A) Schematic layout (left) of the *Lsd1* mRNA with predicted miR-344 binding sites indicated. The *miR-344-3p/miR-344c-3p* seed sequence (shown in red) are evolutionarily conserved among different species.
- (B) Luciferase reporter assays in mESCs co-transfected with constructs containing the *Lsd1* 3'UTRs and *miR-344-1/2/c/h* expression vectors or empty vector (EV). *miR-344-h* is a non-targeting control. Data are presented as average  $\pm$  SD. P-value is from T-test.
- (C) The percentage of MERVL<sup>+</sup> cells in *miR-344-2*-activated cells when overexpressing LSD1, ZMYM2, or LSD1+ZMYM2 (L+Z). Data are presented as average  $\pm$  SD.
- (D) Relative mass spectrums of ZMYM2 (top) and LSD1 (bottom) peptides in DR<sup>+/+</sup> and DR<sup>-/-</sup> cells.
- (E) Schematic diagram of the *Zmym2* allele for the gene trap (GT) knockout.
- (F) RT-qPCR analysis of repetitive elements MERVL, IAP, LINE L1 (LINE1), SINE B1 (SINE), and MMERGLN (GLN) expression in *Zmym2*<sup>+/+</sup> and *Zmym2*<sup>GT/GT</sup> ESCs. Data are presented as average  $\pm$  SD.
- (G) Luciferase activity assay of MERVL LTR reporter in *Zmym2*<sup>+/+</sup> and *Zmym2*<sup>GT/GT</sup> ESCs. Data are presented as average  $\pm$  SD.
- (H) Diagram (top) and images (bottom) of *Zmym2*<sup>+/+</sup> and *Zmym2*<sup>GT/GT</sup> ESCs with 2C::tdTomato reporter. Scale bars, 100  $\mu$ m.



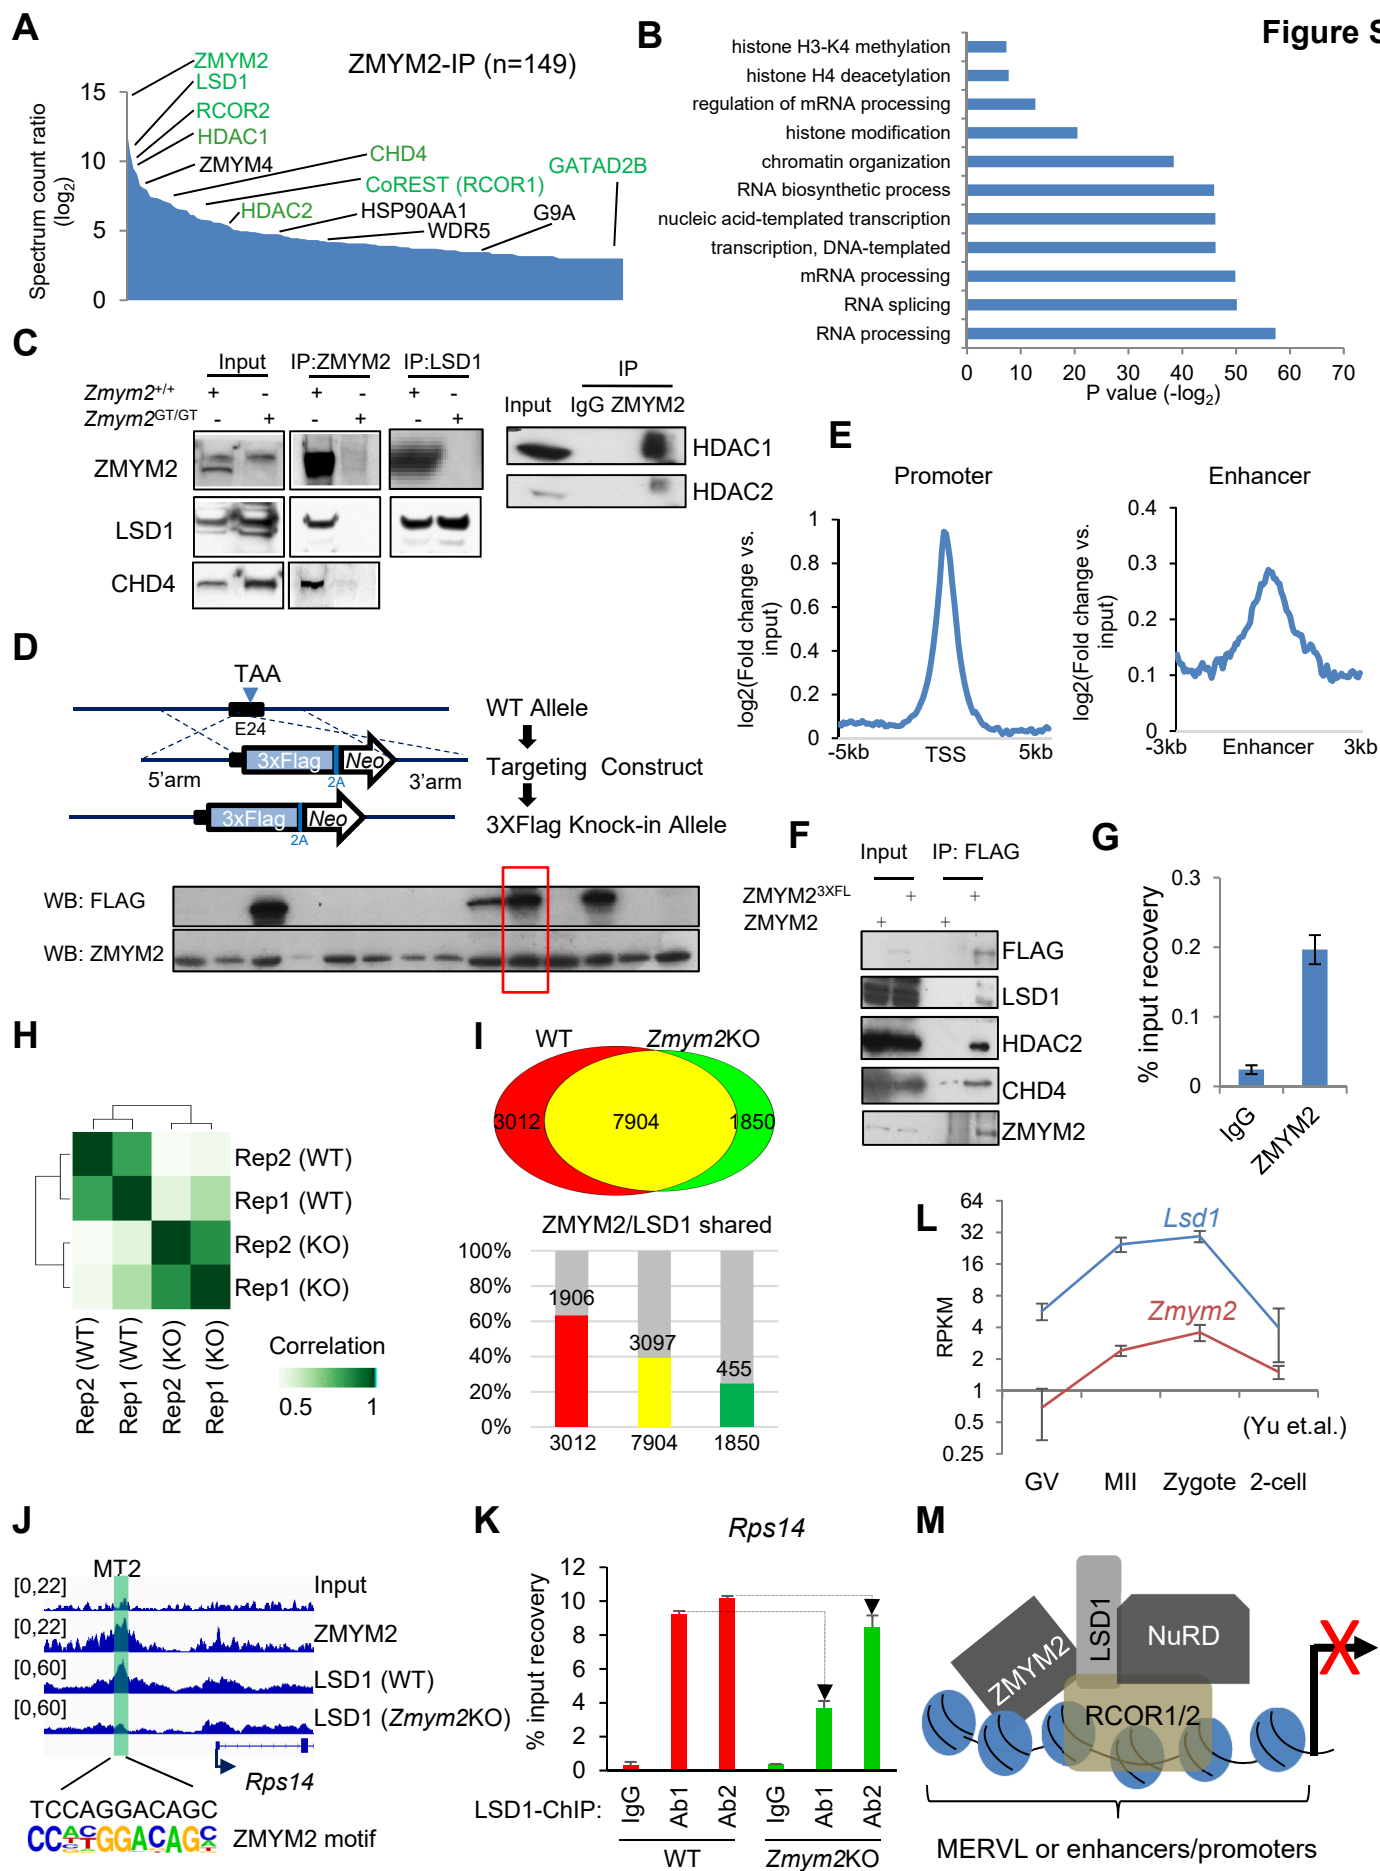

**Figure S5. ZMYM2 physically associates and functionally interacts with the LSD1-NuRD corepressor complex in controlling MERVL expression. Related to Figure 5.**

- (A) AP-MS identification of ZMYM2-interacting partners (n=149). Data are presented by fold change ( $Zmym2^{GT/GT}/Zmym2^{+/+}$ ) of spectrum counts for proteins identified in ESCs.
- (B) Gene Ontology (GO) analysis of biological processes of ZMYM2 partners.
- (C) CoIP validation of physical interactions of ZMYM2 with LSD1/CHD4 and HDAC1/2.
- (D) Targeted knock-in of 3xFLAG into the *Zmym2* locus in mESCs (top) and western blotting analysis of clones. The clone indicated with a red rectangle was used for FLAG ChIP-seq.
- (E) Enrichment of ZMYM2 binding around TSS regions and ESC enhancer regions.
- (F) FLAG CoIP validation in ZMYM2-3xFLAG ESCs to test the interactions of ZMYM2 with LSD1, CHD4, and HDAC2.
- (G) ChIP-qPCR analysis of ZMYM2 enrichment at MERVL LTR region (MT2\_Mm). Data are presented as average  $\pm$  SD.
- (H) Hierarchy clustering analysis of LSD1 ChIP-seq in *Zmym2* WT versus KO ESCs. Two biological replicates were performed in each condition.
- (I) Overlap of the LSD1 ChIP-seq peaks in *Zmym2* WT versus KO ESCs. The number and percentage of ZMYM2 peaks colocalized in each group of LSD1 peaks are indicated at the bottom.
- (J) ZMYM2 and LSD1 cobind at *Rps14* promoter with an MT2 region. ChIP-seq tracks of input and ZMYM2 in ESCs, and of LSD1 in WT and *Zmym2*KO ESCs are indicated.
- (K) ChIP-qPCR validation of LSD1, with 2 different antibodies, at promoters of *Rps14* in *Zmym2* WT and KO ESCs. Data are presented as average  $\pm$  SD.
- (L) Relative expression of *Zmym2* and *Lsd1* at different stages (germinal vesicle (GV), MII oocyte, zygote, 2-cell embryo) during ZGA. Data are from public RNA-seq study (Yu et al., 2016). Data are presented as average  $\pm$  SD.
- (M) A model of ZMYM2-associated LSD1/RCOR1/2-NuRD complex repressing the 2C-specific genes.

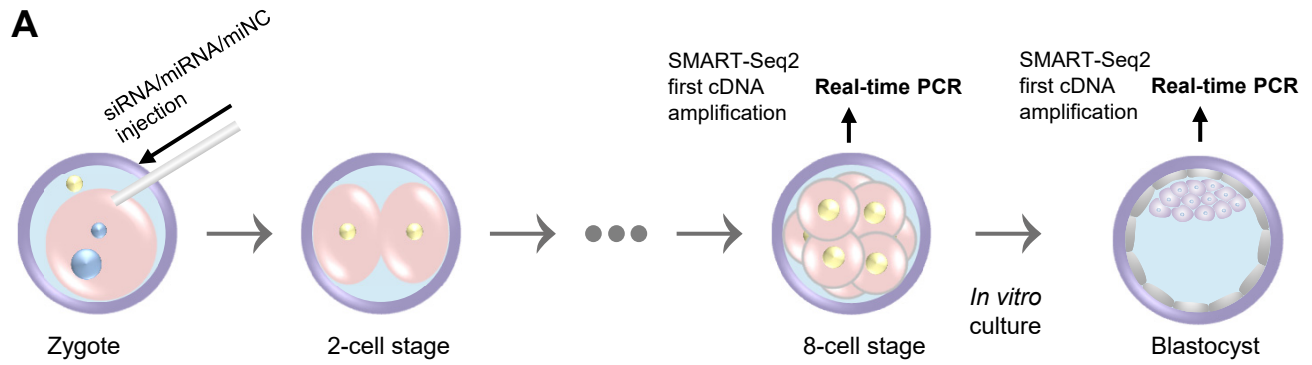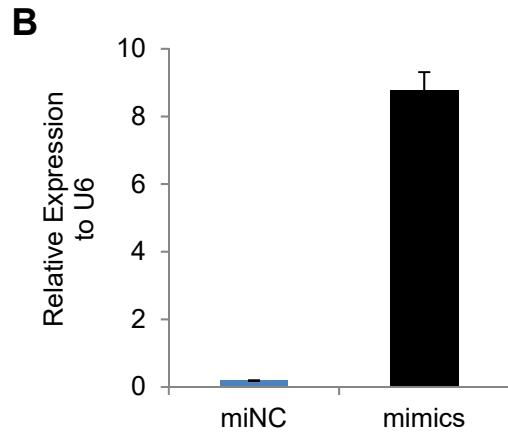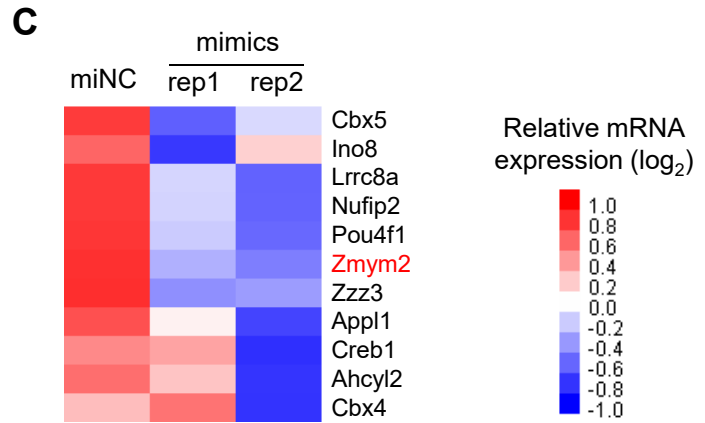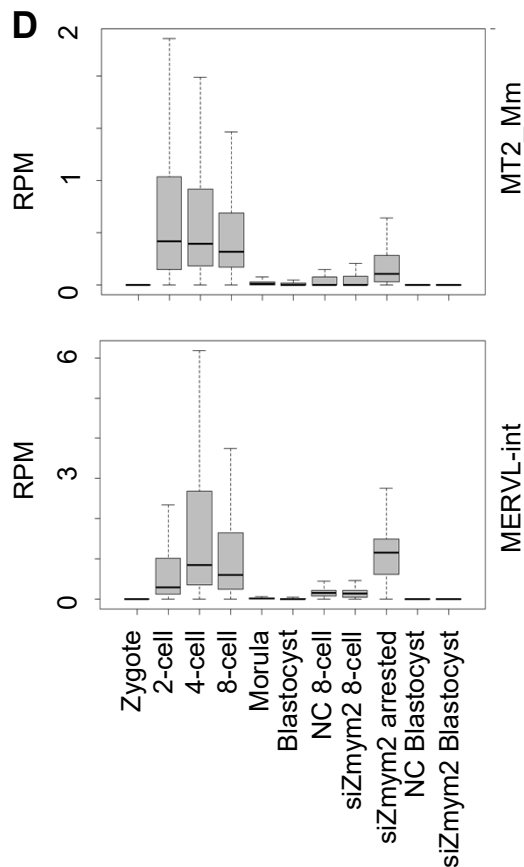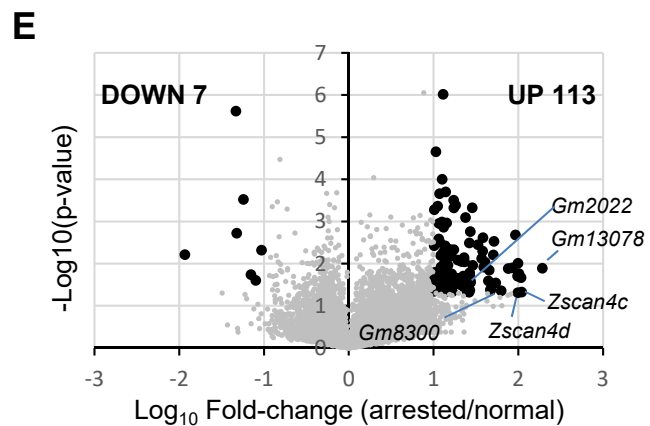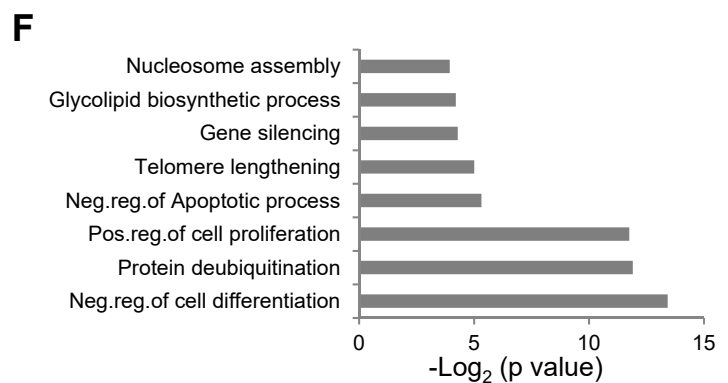

Figure S6

**Figure S6. Zygotic depletion of Zmym2 arrests development at 2C-stage embryos. Related to Figure 6.**

- (A) Depiction of zygotic injection with miRNA mimics, nontargeting control (miNC) or siRNA followed by in vitro culture till the blastocyst stage.
- (B) RT-qPCR analysis of mature miR-344-3p expression in embryos upon injection with miR-344-3p mimics (mimics) or non-target control (miNC).
- (C) Heatmap displaying relative expression of predicted miR-344 targets in embryos upon injection with miR-344-3p mimics (mimics) or non-target control (miNC).
- (D) Box plots showing expression of MT2\_Mm (top) and MERVL-int (bottom) from RNA-seq data of embryos with siZmym2 or non-target control (NC) injections from this study, and normal embryos at different embryonic stages (Zygote, 2-cell, 4-cell, 8-cell, Morula, Blastocyst) from a previous study (Liu et al., 2016).
- (E) Volcano plot showing gene expression between morphologically normal and arrested embryos with siRNA treatment. Black dots and numbers indicate the differentially expressed genes ( $\text{Log}_{10}\text{FoldChange} > 10$ ,  $p\text{-value} < 0.05$ ).
- (F) Gene ontology analysis for significantly upregulated genes in arrested embryos (n=113) in panel E.

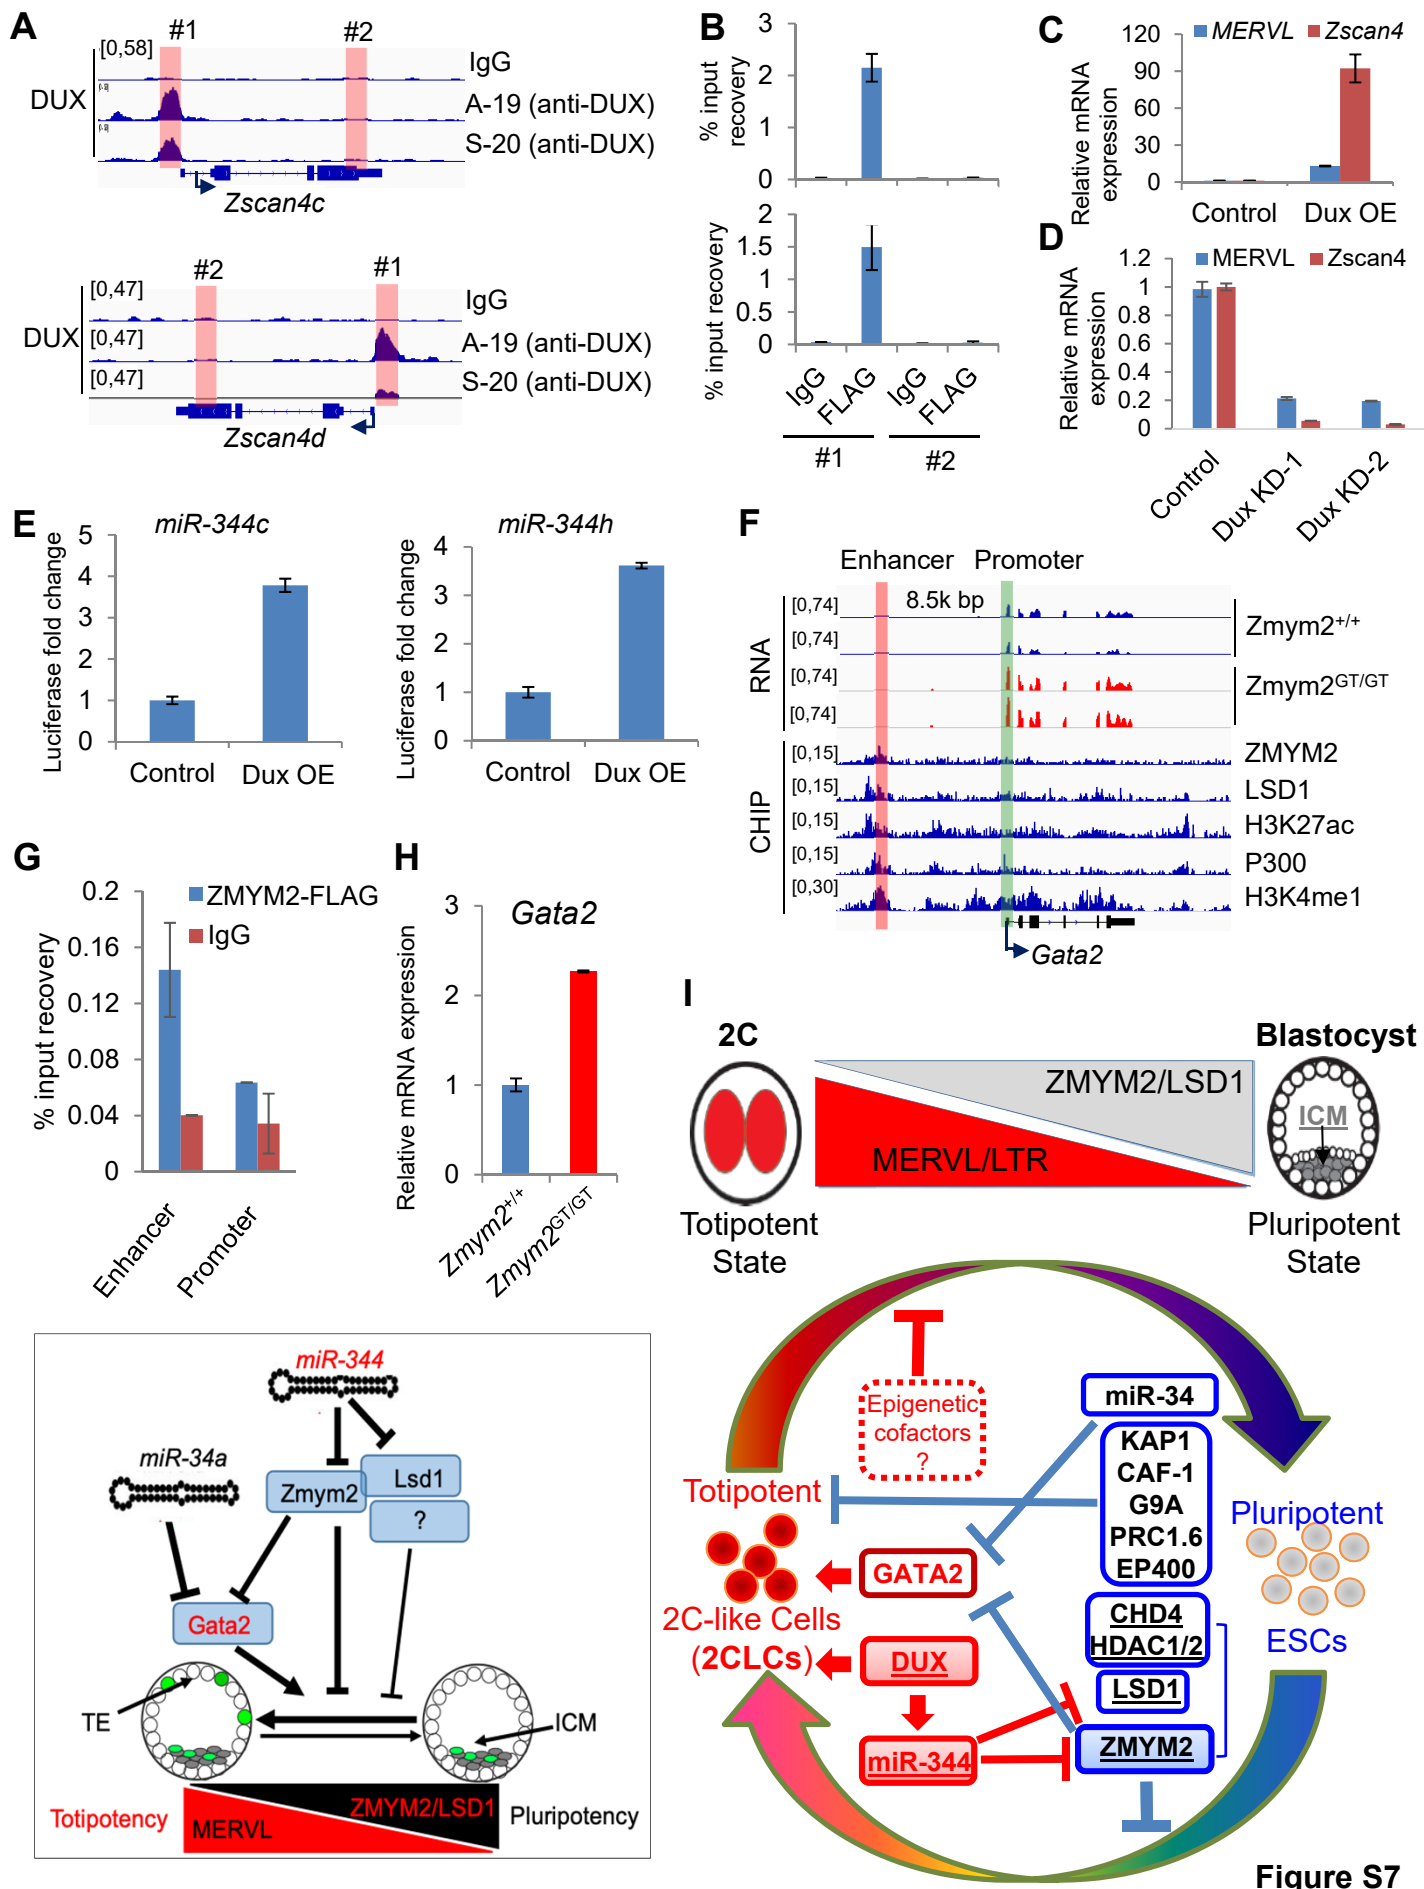

**Figure S7. DUX binds to the *miR-344* promoter and activates *miR-344* expression in MERVL+ cells. Related to Figure 7.**

- (A) DUX ChIP-seq tracks at *Zscan4c* (top) and *Zscan4d* (bottom) loci. Locations of primers for ChIP-qPCR analysis in panel B are indicated.
- (B) ChIP-qPCR of DUX enrichment at *Zscan4c* (top) and *Zscan4d* (bottom) loci. Region #1 is with DUX enrichment, whereas #2 is negative from DUX ChIP-seq data. Data are presented as average  $\pm$  SD.
- (C) RT-qPCR of *MERVL* and *Zscan4* expression upon Dux overexpression (OE) in mESCs. Data are presented as average  $\pm$  SD.
- (D) RT-qPCR of *MERVL* and *Zscan4* expression upon Dux knockdown in sorted MERVL+ mESCs. KD-1 and KD-2 are experiments with 2 independent shRNAs. Data are presented as average  $\pm$  SD.
- (E) Luciferase reporter assay in mESCs co-transfected with the *miR-344c* (left) or *miR-344h* (right) reporters and a DUX expression vector or a control vector. Data are presented as average  $\pm$  SD.
- (F) ZMYM2 represses *Gata2* expression by occupying the enhancer of MERVL regulator *Gata2*. RNA-seq expression profile (top) and ChIP-seq binding profiles (reads per million) (bottom) were shown.
- (G) ChIP-qPCR of ZMYM2 enrichment at the *Gata2* enhancer and promoter regions. Data are presented as average  $\pm$  SD.
- (H) RT-qPCR analysis of *Gata2* expression in *Zmym2*<sup>+/+</sup> and *Zmym2*<sup>GT/GT</sup> ESCs. Data are presented as average  $\pm$  SD.
- (I) A summary model of molecular control of totipotency and pluripotency in vivo (top) and in culture (bottom). The DUX-*miR-344*-Zmym2/Lsd1 axis in regulating embryonic potency revealed by this study is underlined. The molecular pathways involving miR-34a, miR-344, and their downstream targets for totipotency and pluripotency control are further highlighted (bottom left panel). The detailed information is provided in Discussion.
